# Supplementary material
Source: publisher site journal article supplement (https://www.dovepress.com/article/475513)
Supplement: Supplementary file 1 [file get_supplementary_file.php]

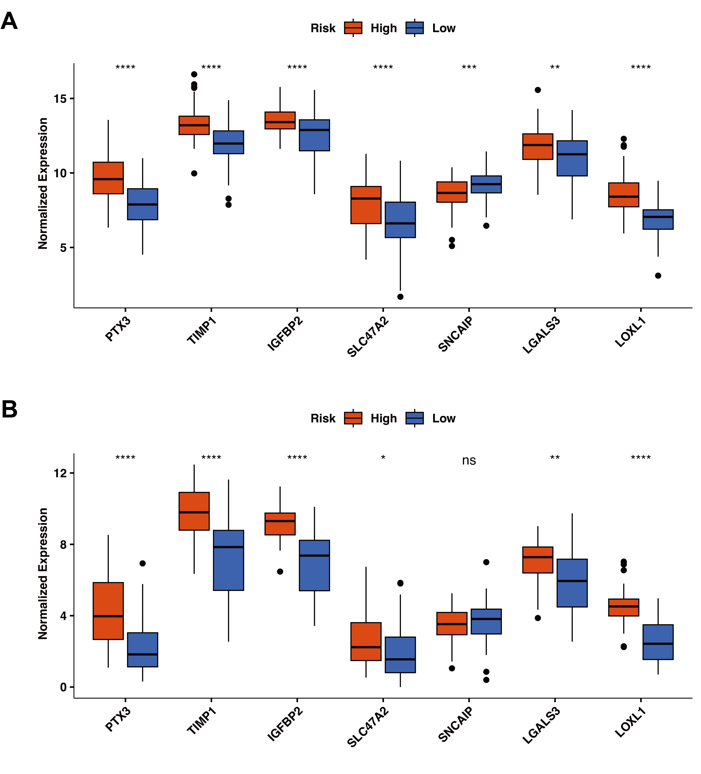


Supplementary Figure S1 The expressions of seven key cell-in-cell related genes (CICRGs) in the high- and low-risk groups. (A) Glioblastoma (GBM) cohort from TCGA database. (B) GBM cohort from CGGA database. PTX3: pentraxin 3, TIMP1: TIMP metallopeptidase inhibitor 1, IGFBP2: insulin like growth factor binding protein 2, SLC47A2: solute carrier family 47 member 2, SNCAIP: synuclein alpha interacting protein, LGALS3: galectin 3, LOXL1: lysyl oxidase like 1. *p-value <0.05, **p-value <0.01, ***p-value <0.001, ****p-value <0.0001, nsp-value >0.05.


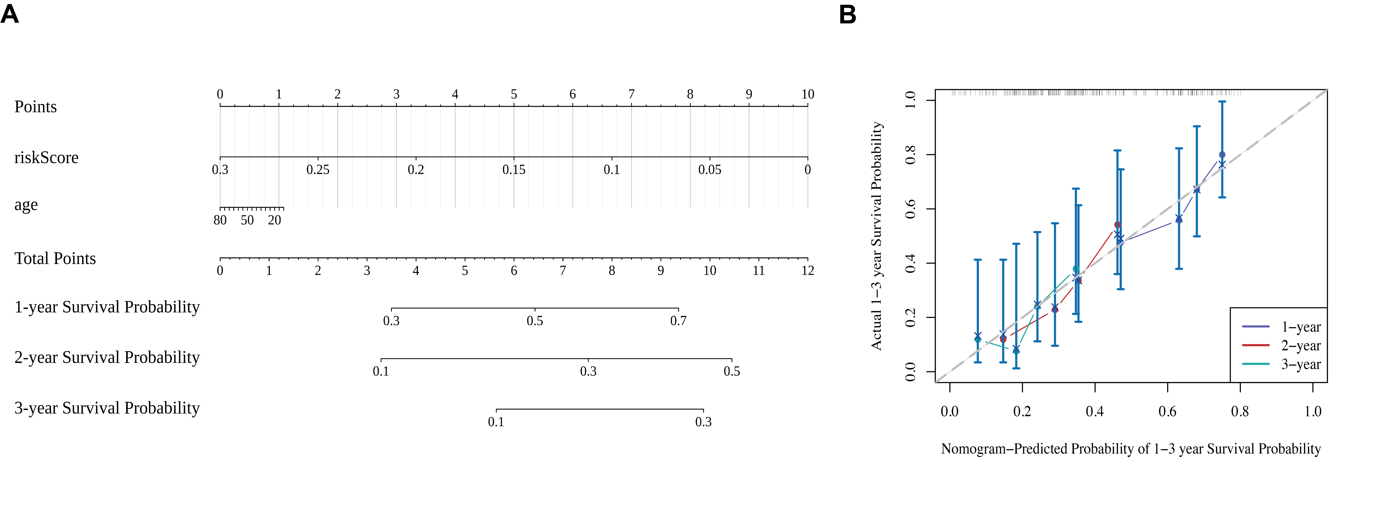
**Supplementary Figure S2 Validation of the nomogram in CGGA-GBM-dataset.** (A) Construction of the nomogram based on risk score and age using CGGA-GBM dataset. (B) Calibration curves of the nomogram for predicting 1-, 2-, 3-year overall survival using CGGA-GBM database.


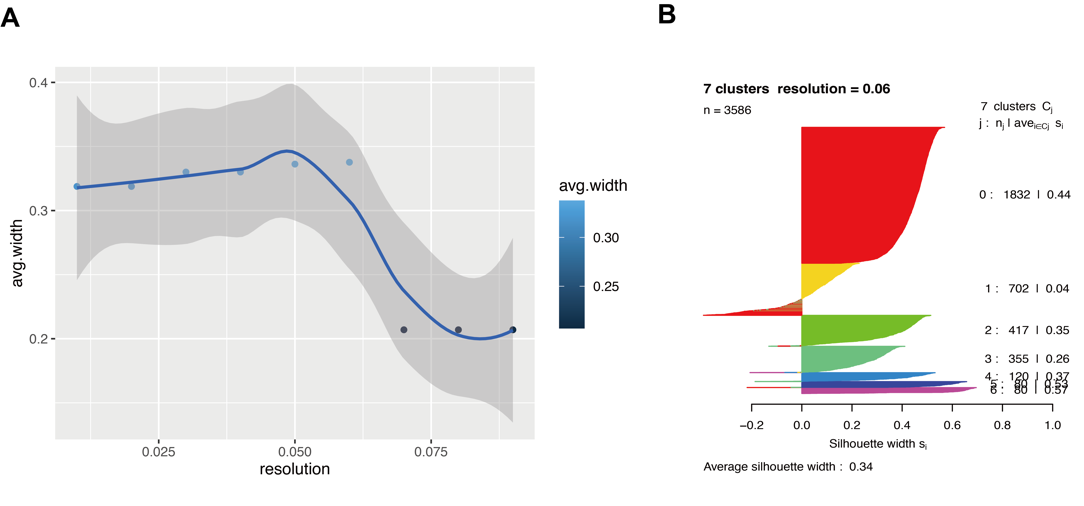


**Supplementary Figure S3 Unsupervised clustering analysis of single cell populations.** (A) The scatter plot of average silhouette width against resolution. When the resolution is 0.06, the silhouette width reaches the highest point 0.34. (B) The silhouette width values ​​of cells in each cell cluster at a resolution of 0.06.


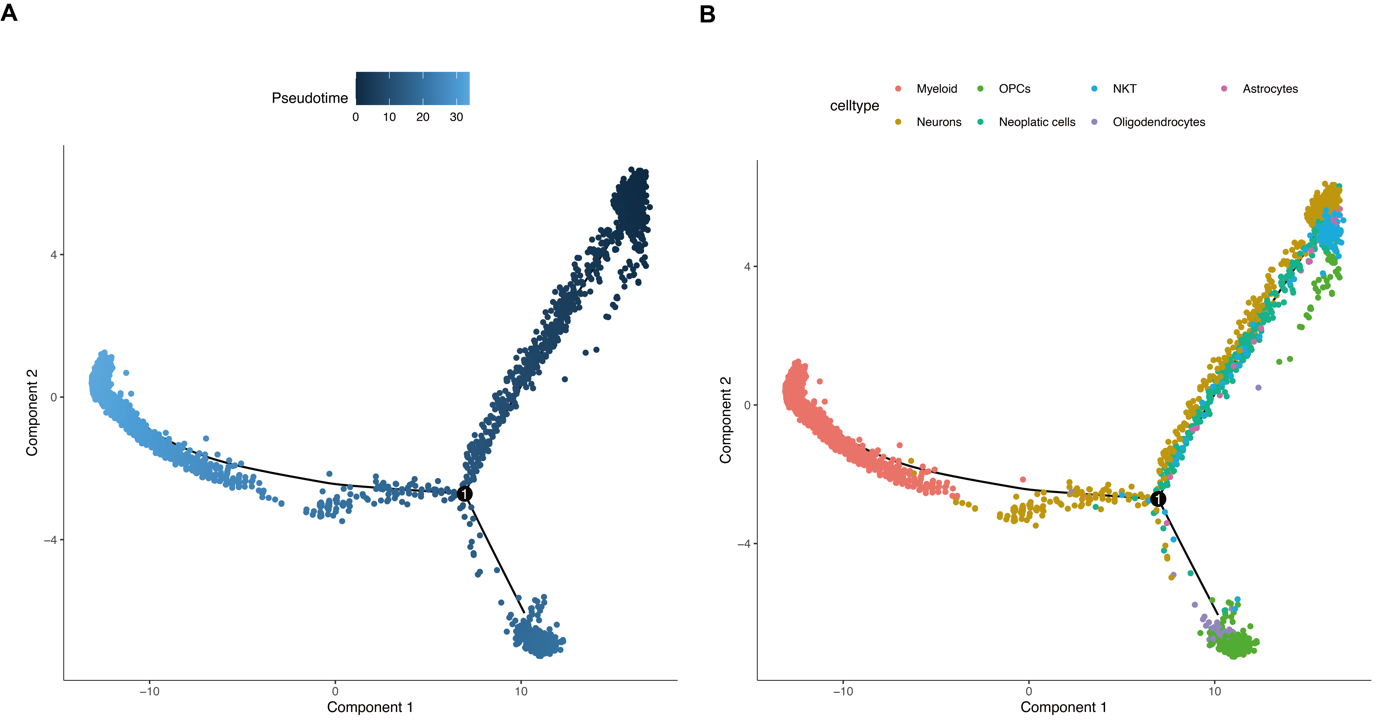


**Supplementary Figure S4 Trajectory analysis of GBM single-cell sequencing data.** (A) The cells are coloured by pseudotime. (B) The cells are coloured by cell types.

Supplementary Table S1 Primer sequences used in the current study.

| **primer** | **sequence** |
| --- | --- |
| PTX3 F | CGTGCATCCAGTGAGACCAAT |
| PTX3 R | CCACCCACCACAAACACTATG |
| TIMP1 F | GCTTCTGGCATCCTGTTGTTG |
| TIMP1 R | CATAACGCTGGTATAAGGTGGTC |
| IGFBP2 F | AGTCCTCGCGAACTGAACTG |
| IGFBP2 R | TGGTCATCGCCATTGTCTCC |
| SLC47A2 F | AATGTCTGCGGAGTTTCTGTAGG |
| SLC47A2 R | AGGATGTGCTGGGTGTTGAGG |
| SNCAIP F | AGTCAGTCCCTTCGCGCTC |
| SNCAIP R | GATTCCTGTGGGCTTTTGCG |
| LGALS3 F | CAGCCAACGAGCGGAAAATGG |
| LGALS3 R | GCTGTCCAGAAGATGGGTAGG |
| LOXL1 F | ACAGCATGGACGAGTTCAGC |
| LOXL1 R | CAGTCGATGTCCGCATTGTA |
| GAPDH F | CGAAGGTGGAGTCAACGGATTT |
| GAPDH R | ATGGGTGGAATCATATTGGAAC |

Supplementary Table S2 The risk score of each patient from TCGA-GBM cohort.

|  | **fustat** | **futime** | **PTX3** | **TIMP1** | **IGFBP2** | **SLC47A2** | **SNCAIP** | **LGALS3** | **LOXL1** | **riskScore** |
| --- | --- | --- | --- | --- | --- | --- | --- | --- | --- | --- |
| **TCGA-26-1442-01** | 0 | 953 | 5.1542 | 8.2779 | 8.5783 | 3.922 | 9.5813 | 8.3723 | 5.3708 | 0.0516558484739145 |
| **TCGA-06-0129-01** | 1 | 1024 | 6.0734 | 7.8666 | 8.7215 | 4.9191 | 10.8673 | 8.3601 | 6.6776 | 0.0870747680011331 |
| **TCGA-15-1444-01** | 1 | 1537 | 4.8773 | 9.198 | 8.9654 | 6.559 | 10.2644 | 8.0429 | 5.0043 | 0.0998316776472562 |
| **TCGA-19-1787-01** | 1 | 385 | 7.7281 | 12.2593 | 9.8388 | 6.5079 | 8.9969 | 12.4521 | 5.6712 | 0.104303249617021 |
| **TCGA-06-0178-01** | 1 | 2681 | 5.8743 | 10.7826 | 9.7243 | 5.9659 | 9.3844 | 10.8144 | 6.406 | 0.108849276905077 |
| **TCGA-06-0221-02** | 1 | 603 | 5.1734 | 9.1723 | 10.5139 | 3.3956 | 10.7647 | 8.723 | 6.6256 | 0.116303283555095 |
| **TCGA-06-5417-01** | 0 | 155 | 7.1902 | 9.8646 | 10.2305 | 6.8987 | 10.8873 | 8.4123 | 3.11 | 0.134028669418713 |
| **TCGA-16-0846-01** | 1 | 119 | 5.2135 | 11.3729 | 10.5152 | 7.4292 | 9.249 | 10.9931 | 5.7628 | 0.152065157697289 |
| **TCGA-27-1835-01** | 1 | 648 | 7.8205 | 12.7345 | 12.9953 | 2.6686 | 10.215 | 10.9249 | 4.3987 | 0.177202238720296 |
| **TCGA-06-2570-01** | 0 | 958 | 6.6097 | 10.6263 | 11.1978 | 2.8708 | 10.1369 | 8.4054 | 6.1387 | 0.198714066108016 |
| **TCGA-06-5859-01** | 0 | 139 | 4.6477 | 11.4953 | 9.5511 | 10.8229 | 10.4411 | 9.8187 | 5.4076 | 0.226707818252551 |
| **TCGA-06-5416-01** | 0 | 204 | 6.5443 | 12.935 | 13.352 | 1.6932 | 8.0517 | 11.98 | 7.0531 | 0.231201974237256 |
| **TCGA-19-2629-01** | 1 | 737 | 5.9777 | 9.5766 | 9.3524 | 8.0102 | 9.2327 | 8.0055 | 6.006 | 0.244868584480485 |
| **TCGA-06-0749-01** | 1 | 82 | 4.9074 | 11.6359 | 10.5247 | 9.1515 | 8.7402 | 11.2534 | 6.9259 | 0.260658381598268 |
| **TCGA-06-1804-01** | 1 | 414 | 5.2247 | 10.2499 | 9.5517 | 7.5045 | 11.4081 | 8.2958 | 8.6519 | 0.354823170212498 |
| **TCGA-41-5651-01** | 1 | 460 | 7.4234 | 10.3223 | 12.7411 | 4.2694 | 9.801 | 9.9138 | 7.1163 | 0.386902754393696 |
| **TCGA-06-2567-01** | 1 | 133 | 8.0379 | 11.5389 | 10.114 | 9.5909 | 9.8137 | 10.2652 | 6.3976 | 0.397139071207121 |
| **TCGA-06-0238-01** | 1 | 405 | 7.2706 | 11.5795 | 12.161 | 6.743 | 8.8884 | 11.2495 | 7.2759 | 0.430295565863506 |
| **TCGA-06-0184-01** | 1 | 2126 | 6.5649 | 14.2481 | 13.702 | 6.6163 | 8.8579 | 13.3043 | 6.7406 | 0.456695328296984 |
| **TCGA-28-5207-01** | 1 | 343 | 6.9928 | 10.9432 | 11.3814 | 8.2656 | 10.2538 | 9.5445 | 6.3093 | 0.456812480544899 |
| **TCGA-14-1034-02** | 1 | 485 | 8.7096 | 11.8425 | 13.817 | 4.9793 | 8.0835 | 13.0288 | 7.5412 | 0.465006870519838 |
| **TCGA-28-5204-01** | 1 | 454 | 8.161 | 12.0319 | 13.8647 | 3.9482 | 7.6695 | 12.0441 | 7.1484 | 0.465080296408545 |
| **TCGA-32-2616-01** | 1 | 224 | 7.0239 | 11.7352 | 14.0393 | 7.3607 | 8.9856 | 14.0892 | 7.9188 | 0.465610771189299 |
| **TCGA-26-5133-01** | 0 | 452 | 4.5281 | 10.354 | 11.6765 | 6.243 | 8.0187 | 8.1846 | 6.9819 | 0.469224475909292 |
| **TCGA-14-1823-01** | 1 | 543 | 10.9896 | 14.2834 | 10.8239 | 9.3189 | 8.7283 | 13.0589 | 6.2483 | 0.474156598897296 |
| **TCGA-14-1825-01** | 1 | 232 | 6.374 | 11.5987 | 13.034 | 5.1746 | 9.5251 | 9.1872 | 5.8955 | 0.489715607050387 |
| **TCGA-19-5960-01** | 1 | 455 | 8.2741 | 10.5777 | 11.2155 | 7.6103 | 11.4435 | 8.6891 | 6.1986 | 0.497835683065157 |
| **TCGA-06-0744-01** | 1 | 1426 | 8.8642 | 11.7299 | 13.4583 | 6.1541 | 7.8556 | 11.538 | 5.753 | 0.520922729360952 |
| **TCGA-14-1829-01** | 0 | 218 | 9.8572 | 12.653 | 12.2371 | 8.5904 | 7.9303 | 12.6816 | 6.1205 | 0.53405083099333 |
| **TCGA-06-5411-01** | 1 | 254 | 8.566 | 12.5366 | 12.9586 | 5.7535 | 8.7377 | 11.2618 | 6.5404 | 0.538508068429935 |
| **TCGA-32-1980-01** | 1 | 36 | 9.551 | 13.0554 | 12.3284 | 6.6003 | 6.4596 | 12.1565 | 6.4596 | 0.538999147208551 |
| **TCGA-14-0871-01** | 1 | 880 | 6.4992 | 12.0609 | 13.1638 | 3.4039 | 8.7016 | 9.113 | 6.8974 | 0.547648779465103 |
| **TCGA-32-5222-01** | 1 | 585 | 9.3522 | 12.2336 | 13.5538 | 6.0953 | 9.6527 | 12.7203 | 7.3025 | 0.556159832403264 |
| **TCGA-27-1834-01** | 1 | 1233 | 6.7539 | 11.3513 | 10.4281 | 10.5794 | 9.2259 | 9.5261 | 6.4316 | 0.563845104693798 |
| **TCGA-32-1970-01** | 1 | 468 | 7.8374 | 11.6238 | 12.8854 | 7.9009 | 9.4936 | 9.9693 | 4.804 | 0.571552502553101 |
| **TCGA-06-2569-01** | 0 | 13 | 7.4833 | 11.8396 | 11.5945 | 2.1056 | 9.6499 | 6.8833 | 7.5647 | 0.581028739666322 |
| **TCGA-12-5295-01** | 1 | 454 | 7.6107 | 12.8615 | 14.1417 | 7.0553 | 8.5363 | 11.7027 | 5.0247 | 0.589899624628873 |
| **TCGA-12-1597-01** | 1 | 675 | 7.5254 | 10.9027 | 14.3342 | 5.1213 | 9.5471 | 10.552 | 6.3116 | 0.598167946203918 |
| **TCGA-06-0219-01** | 1 | 22 | 8.8808 | 13.225 | 13.4151 | 6.9502 | 9.2704 | 13.4315 | 7.7305 | 0.613573907748869 |
| **TCGA-06-2558-01** | 1 | 380 | 7.309 | 11.4439 | 12.6237 | 7.9333 | 9.5292 | 10.4292 | 6.449 | 0.616710944713962 |
| **TCGA-28-5209-01** | 0 | 442 | 9.4448 | 12.0735 | 13.4978 | 5.6041 | 10.7705 | 11.9922 | 7.7905 | 0.636770443448901 |
| **TCGA-19-2620-01** | 1 | 148 | 9.5736 | 13.632 | 12.5295 | 7.2137 | 8.4432 | 12.7663 | 7.4512 | 0.653701624269546 |
| **TCGA-27-2519-01** | 1 | 550 | 10.296 | 12.7771 | 11.3829 | 10.4714 | 9.6482 | 10.523 | 4.3864 | 0.665331402413478 |
| **TCGA-06-5414-01** | 0 | 273 | 10.6393 | 12.7329 | 12.5797 | 6.4737 | 7.0188 | 12.614 | 7.4973 | 0.684703093468372 |
| **TCGA-06-2563-01** | 0 | 932 | 8.0795 | 12.6446 | 13.6911 | 6.3607 | 8.8639 | 12.0348 | 7.2967 | 0.699106415810169 |
| **TCGA-12-0618-01** | 1 | 395 | 7.1216 | 10.3125 | 13.6289 | 6.8975 | 9.7067 | 9.278 | 5.7021 | 0.699992275831322 |
| **TCGA-06-0158-01** | 1 | 329 | 7.9647 | 11.5586 | 12.3618 | 8.2331 | 9.3869 | 11.3799 | 7.8944 | 0.709871717864107 |
| **TCGA-14-1402-02** | 1 | 975 | 9.7667 | 12.7557 | 13.9054 | 8.0691 | 9.1908 | 14.2223 | 7.5132 | 0.712942410104467 |
| **TCGA-26-5136-01** | 1 | 577 | 8.1372 | 12.7854 | 11.6821 | 10.6958 | 10.6491 | 11.5026 | 6.8534 | 0.736094325925267 |
| **TCGA-06-0132-01** | 1 | 771 | 10.3445 | 13.8848 | 10.7974 | 7.9767 | 8.4792 | 11.1565 | 7.4186 | 0.741062914613008 |
| **TCGA-28-1747-01** | 1 | 77 | 7.3376 | 11.5756 | 12.1013 | 8.7595 | 9.3772 | 9.7901 | 6.5817 | 0.763526359853672 |
| **TCGA-06-5408-01** | 1 | 357 | 9.1999 | 12.5258 | 14.0076 | 6.8942 | 9.7988 | 11.7316 | 6.1635 | 0.769437554294299 |
| **TCGA-19-0957-02** | 1 | 666 | 7.2431 | 12.8562 | 12.9472 | 7.6041 | 8.7865 | 11.4086 | 7.4004 | 0.769527223106457 |
| **TCGA-06-5858-01** | 0 | 187 | 7.6615 | 11.9519 | 13.5777 | 5.9453 | 9.1381 | 11.465 | 8.2288 | 0.775998681328948 |
| **TCGA-28-2514-01** | 0 | 160 | 7.8853 | 11.9744 | 12.9449 | 7.3131 | 9.1905 | 10.5492 | 6.8773 | 0.777307157754552 |
| **TCGA-19-4065-01** | 0 | 214 | 9.3746 | 14.88 | 13.2519 | 6.0973 | 8.7798 | 13.7596 | 8.7641 | 0.791138893857746 |
| **TCGA-14-0817-01** | 1 | 164 | 7.6275 | 13.0985 | 13.5043 | 8.6155 | 9.351 | 12.7779 | 7.4138 | 0.794461046880835 |
| **TCGA-28-5208-01** | 1 | 544 | 9.1179 | 12.9094 | 13.3348 | 6.1286 | 8.5692 | 12.1583 | 8.0149 | 0.818158786357838 |
| **TCGA-06-5418-01** | 1 | 83 | 10.7018 | 13.0259 | 13.5045 | 7.6546 | 9.1224 | 14.154 | 8.2467 | 0.820592568626755 |
| **TCGA-06-0882-01** | 1 | 632 | 10.3955 | 13.9071 | 12.4411 | 4.9989 | 8.6604 | 12.5803 | 9.4701 | 0.82069004214681 |
| **TCGA-27-2523-01** | 1 | 489 | 8.73 | 13.0736 | 14.1681 | 5.4552 | 8.738 | 11.9146 | 7.2027 | 0.822400325883995 |
| **TCGA-27-2526-01** | 1 | 87 | 9.0007 | 13.3578 | 13.1468 | 8.7338 | 8.3148 | 12.2447 | 6.188 | 0.827223444233512 |
| **TCGA-28-5220-01** | 1 | 388 | 4.9682 | 10.9145 | 12.398 | 9.2443 | 10.1009 | 9.3817 | 7.4961 | 0.827324875769199 |
| **TCGA-28-1753-01** | 0 | 37 | 7.9134 | 13.1172 | 13.9011 | 5.097 | 9.2673 | 11.9565 | 8.5755 | 0.839751056521069 |
| **TCGA-02-2485-01** | 0 | 470 | 8.3954 | 11.7145 | 13.0119 | 5.3742 | 10.5717 | 10.3247 | 8.5736 | 0.843047109882642 |
| **TCGA-76-4929-01** | 1 | 111 | 5.9767 | 12.5562 | 12.4046 | 10.2571 | 9.898 | 11.0732 | 7.3231 | 0.846011485739927 |
| **TCGA-41-2571-01** | 1 | 26 | 6.9753 | 10.8324 | 14.2567 | 6.0522 | 8.3199 | 11.3801 | 8.2518 | 0.854040951070056 |
| **TCGA-14-0736-02** | 1 | 460 | 8.2757 | 13.194 | 12.6249 | 8.9605 | 8.3323 | 12.1751 | 7.3617 | 0.861031859614393 |
| **TCGA-06-2557-01** | 1 | 33 | 8.4929 | 11.2345 | 13.3751 | 8.0864 | 10.7268 | 10.6643 | 6.729 | 0.861603761812527 |
| **TCGA-12-3653-01** | 1 | 442 | 7.4091 | 12.992 | 14.4727 | 7.7525 | 9.5439 | 10.5096 | 4.5081 | 0.868277461072868 |
| **TCGA-19-1390-01** | 1 | 772 | 4.7791 | 11.1416 | 14.1461 | 3.7675 | 7.6175 | 8.3658 | 7.4926 | 0.884224431021432 |
| **TCGA-76-4932-01** | 1 | 1458 | 8.5797 | 12.7756 | 14.2573 | 6.2875 | 7.8034 | 13.1812 | 8.3237 | 0.892039717004604 |
| **TCGA-76-4925-01** | 1 | 146 | 9.8414 | 12.3362 | 15.5699 | 4.8511 | 8.2562 | 13.5525 | 7.6584 | 0.8981874142116 |
| **TCGA-14-0790-01** | 1 | 419 | 9.2114 | 11.5116 | 13.6011 | 5.7246 | 9.879 | 12.05 | 9.3746 | 0.915840663968305 |
| **TCGA-06-2564-01** | 0 | 181 | 8.711 | 11.9449 | 12.7551 | 8.1871 | 9.3405 | 11.0214 | 7.4905 | 0.944255275377689 |
| **TCGA-32-2634-01** | 0 | 693 | 8.5193 | 11.1637 | 12.3742 | 8.5013 | 10.3868 | 10.6007 | 8.218 | 0.9653697047404 |
| **TCGA-76-4931-01** | 1 | 279 | 9.0497 | 12.0117 | 13.7023 | 6.4833 | 8.6676 | 11.2756 | 7.4405 | 0.972638923121181 |
| **TCGA-06-2565-01** | 1 | 506 | 8.741 | 12.0129 | 13.4342 | 6.4551 | 9.3124 | 11.7296 | 8.751 | 0.973023517620701 |
| **TCGA-06-2561-01** | 1 | 537 | 9.0514 | 13.4482 | 12.1152 | 5.8128 | 7.2424 | 9.7691 | 7.2795 | 0.979867738156262 |
| **TCGA-41-2572-01** | 1 | 406 | 9.1556 | 13.1363 | 14.6274 | 6.1029 | 9.1463 | 12.8681 | 7.7817 | 0.980277528986148 |
| **TCGA-16-1045-01** | 1 | 883 | 9.5661 | 13.3885 | 12.1024 | 8.5762 | 8.5525 | 10.5303 | 6.267 | 0.993700707827588 |
| **TCGA-06-0152-02** | 1 | 375 | 10.1765 | 12.5892 | 13.164 | 5.9806 | 6.8483 | 12.3888 | 8.6332 | 0.99582094035968 |
| **TCGA-27-2528-01** | 1 | 480 | 8.2284 | 13.2483 | 14.087 | 6.9519 | 8.1165 | 13.0466 | 8.4507 | 1.01277728511783 |
| **TCGA-15-0742-01** | 1 | 419 | 9.6014 | 12.8032 | 14.3382 | 7.5207 | 9.9131 | 11.6056 | 5.9431 | 1.030538968622 |
| **TCGA-12-0616-01** | 1 | 448 | 7.3791 | 12.4767 | 13.618 | 7.883 | 7.683 | 11.489 | 7.4154 | 1.03626242404418 |
| **TCGA-06-0168-01** | 1 | 598 | 11.0328 | 13.1953 | 11.6254 | 8.8446 | 8.5764 | 11.5368 | 7.491 | 1.04137313297227 |
| **TCGA-28-5215-01** | 1 | 335 | 8.8397 | 11.8341 | 11.7067 | 8.5002 | 8.6867 | 10.3179 | 8.1805 | 1.04562810456191 |
| **TCGA-06-0125-02** | 1 | 1448 | 9.954 | 12.7873 | 12.9835 | 8.2614 | 9.2281 | 12.7021 | 8.4599 | 1.06388552036873 |
| **TCGA-32-1982-01** | 1 | 142 | 7.3206 | 12.8542 | 14.7108 | 5.9893 | 6.8357 | 12.7645 | 8.529 | 1.06538169444088 |
| **TCGA-27-1831-01** | 1 | 505 | 10.2977 | 13.3617 | 13.3396 | 8.8656 | 8.0989 | 14.0976 | 8.4171 | 1.07910848973855 |
| **TCGA-19-2619-01** | 0 | 294 | 10.252 | 13.0314 | 13.4207 | 6.0756 | 8.5767 | 11.8072 | 7.9929 | 1.07996619179364 |
| **TCGA-26-5134-01** | 0 | 167 | 6.3384 | 12.5075 | 13.2173 | 6.4097 | 9.3991 | 10.2211 | 8.813 | 1.08832818062738 |
| **TCGA-06-5413-01** | 0 | 268 | 8.3087 | 12.8409 | 13.5752 | 8.0311 | 10.1232 | 11.2256 | 7.2344 | 1.10052683466594 |
| **TCGA-06-0646-01** | 1 | 175 | 10.6823 | 12.4894 | 12.7035 | 8.5974 | 9.3246 | 10.9379 | 6.4395 | 1.11015086993354 |
| **TCGA-06-5856-01** | 1 | 114 | 9.7404 | 12.5723 | 13.3452 | 7.882 | 10.3423 | 11.2207 | 7.1934 | 1.12478415675942 |
| **TCGA-06-0138-01** | 1 | 737 | 9.5616 | 12.985 | 12.6758 | 8.7487 | 9.0108 | 11.5756 | 7.4582 | 1.12711372443428 |
| **TCGA-06-0686-01** | 1 | 432 | 8.0687 | 12.0261 | 14.1315 | 5.8481 | 8.1722 | 11.1369 | 8.1722 | 1.13066753873621 |
| **TCGA-08-0386-01** | 1 | 548 | 6.3871 | 11.6164 | 12.542 | 8.3338 | 10.0418 | 9.3995 | 8.2168 | 1.15130029715405 |
| **TCGA-06-0649-01** | 1 | 64 | 8.5965 | 12.491 | 11.7989 | 9.8108 | 9.467 | 10.5973 | 7.8474 | 1.17455999025622 |
| **TCGA-02-2486-01** | 1 | 618 | 10.6622 | 13.6737 | 12.9503 | 11.2837 | 8.4147 | 14.3022 | 7.4644 | 1.17837470305588 |
| **TCGA-32-2638-01** | 1 | 766 | 10.0162 | 12.8754 | 12.8422 | 9.1672 | 9.7454 | 12.4924 | 8.2741 | 1.19704222716058 |
| **TCGA-06-0743-01** | 1 | 803 | 8.6516 | 12.0793 | 12.4445 | 8.883 | 9.4836 | 11.109 | 8.5755 | 1.21151889080273 |
| **TCGA-06-0645-01** | 1 | 175 | 12.087 | 13.7473 | 13.0542 | 7.9094 | 8.8682 | 13.3148 | 8.1487 | 1.22294115921943 |
| **TCGA-26-5132-01** | 0 | 286 | 9.0316 | 12.1708 | 13.1563 | 9.2832 | 9.1346 | 11.7228 | 7.7051 | 1.23627832052024 |
| **TCGA-32-2615-01** | 1 | 485 | 10.7243 | 13.5305 | 12.4548 | 9.6198 | 9.3429 | 12.1276 | 7.3448 | 1.24400009435022 |
| **TCGA-02-2483-01** | 0 | 466 | 8.0165 | 11.8916 | 14.1291 | 5.6791 | 8.6797 | 9.2249 | 6.671 | 1.2571358083214 |
| **TCGA-19-2625-01** | 1 | 124 | 9.2979 | 13.1162 | 12.553 | 9.567 | 9.4312 | 11.4073 | 7.4857 | 1.26625670968861 |
| **TCGA-06-0171-02** | 1 | 399 | 10.1356 | 14.5623 | 11.6197 | 9.0837 | 7.4446 | 11.4793 | 7.5293 | 1.27596404243642 |
| **TCGA-27-2521-01** | 1 | 510 | 6.6521 | 9.9712 | 13.1154 | 7.127 | 10.3794 | 8.5373 | 8.6236 | 1.29285627500587 |
| **TCGA-28-2509-01** | 0 | 145 | 8.4947 | 13.4642 | 14.0065 | 8.5343 | 8.5765 | 13.1091 | 8.3626 | 1.30394252360952 |
| **TCGA-06-0130-01** | 1 | 394 | 7.8679 | 13.65 | 11.9007 | 6.163 | 6.7585 | 12.0629 | 11.7583 | 1.30852150049424 |
| **TCGA-12-0821-01** | 1 | 323 | 8.2265 | 12.1445 | 13.5418 | 6.9652 | 9.7603 | 8.9797 | 6.4985 | 1.32428541988244 |
| **TCGA-06-0141-01** | 1 | 313 | 10.7047 | 15.7404 | 12.7515 | 6.8256 | 8.0823 | 12.148 | 7.8027 | 1.33619327528127 |
| **TCGA-76-4926-01** | 1 | 138 | 8.2354 | 12.4095 | 12.3532 | 9.0958 | 9.8711 | 10.7778 | 8.8792 | 1.39141615877026 |
| **TCGA-06-0745-01** | 1 | 239 | 8.6169 | 13.5163 | 14.6932 | 8.9545 | 8.4606 | 12.1399 | 6.0701 | 1.41300191999301 |
| **TCGA-02-0047-01** | 1 | 448 | 9.0132 | 12.6873 | 12.2075 | 9.1062 | 8.8029 | 10.1328 | 7.5722 | 1.43958867877283 |
| **TCGA-12-0619-01** | 1 | 1062 | 8.7637 | 13.8159 | 13.1158 | 9.7854 | 8.9049 | 12.1085 | 7.6911 | 1.45290470662598 |
| **TCGA-12-3652-01** | 1 | 1062 | 9.1607 | 14.0313 | 15.7719 | 4.473 | 8.4053 | 13.3771 | 8.9575 | 1.45768354256851 |
| **TCGA-19-2624-01** | 1 | 5 | 7.5443 | 12.0955 | 14.1984 | 6.691 | 9.5865 | 10.1946 | 8.2175 | 1.53668264967578 |
| **TCGA-06-0174-01** | 1 | 98 | 8.2021 | 11.9502 | 14.5199 | 6.5279 | 9.5582 | 10.7508 | 8.3023 | 1.55177225175498 |
| **TCGA-12-5299-01** | 1 | 98 | 10.2911 | 13.2064 | 14.4847 | 8.002 | 7.5572 | 13.9225 | 8.725 | 1.56666609161059 |
| **TCGA-27-1837-01** | 1 | 427 | 8.7944 | 12.6569 | 13.9035 | 6.4968 | 9.466 | 10.8891 | 8.728 | 1.58230689060435 |
| **TCGA-06-0187-01** | 1 | 828 | 11.0659 | 12.7997 | 13.0014 | 7.2636 | 9.399 | 10.902 | 8.1299 | 1.58422994933303 |
| **TCGA-12-3650-01** | 1 | 333 | 8.1166 | 12.1128 | 14.9564 | 6.5726 | 9.5576 | 10.788 | 7.7311 | 1.58932989080574 |
| **TCGA-28-5216-01** | 0 | 415 | 9.2912 | 13.2838 | 14.0873 | 7.5697 | 9.2406 | 11.4376 | 7.73 | 1.62575425602815 |
| **TCGA-76-4927-01** | 1 | 535 | 9.9094 | 13.0935 | 13.8542 | 8.3465 | 8.6675 | 12.2404 | 8.3141 | 1.723084286453 |
| **TCGA-06-2562-01** | 1 | 382 | 11.6864 | 13.8906 | 13.2887 | 6.0624 | 6.7433 | 13.0588 | 9.9445 | 1.72425869464598 |
| **TCGA-06-0211-02** | 1 | 360 | 11.3506 | 13.7551 | 13.4044 | 7.7764 | 7.442 | 12.638 | 8.3997 | 1.72479283692911 |
| **TCGA-26-5139-01** | 0 | 48 | 11.1935 | 12.9723 | 13.9836 | 8.3041 | 8.7174 | 12.8568 | 8.6539 | 1.88064093731483 |
| **TCGA-06-0156-01** | 1 | 178 | 10.49265 | 12.8707 | 12.5933 | 9.7413 | 9.60885 | 10.62345 | 7.68345 | 1.93935637880169 |
| **TCGA-14-2554-01** | 1 | 532 | 11.1519 | 13.5871 | 12.627 | 9.1956 | 8.1838 | 11.4765 | 7.959 | 1.94825248748441 |
| **TCGA-27-2524-01** | 1 | 231 | 13.1766 | 14.6858 | 15.3678 | 4.9516 | 6.3336 | 15.5686 | 10.0513 | 1.99750473089496 |
| **TCGA-28-2513-01** | 0 | 222 | 12.2557 | 14.2093 | 13.1226 | 9.1495 | 9.1631 | 13.4376 | 9.108 | 2.01890539229208 |
| **TCGA-06-0157-01** | 1 | 97 | 8.0781 | 11.8987 | 12.9806 | 8.6878 | 9.0858 | 10.3749 | 9.6113 | 2.05516741804768 |
| **TCGA-06-5410-01** | 1 | 108 | 13.5598 | 15.9495 | 13.1834 | 6.1509 | 5.0976 | 13.2344 | 8.3899 | 2.07346024754838 |
| **TCGA-14-0789-01** | 1 | 342 | 11.776 | 15.4559 | 13.4826 | 6.2867 | 6.8339 | 13.3273 | 9.8368 | 2.1464740007047 |
| **TCGA-06-0644-01** | 1 | 384 | 9.0608 | 14.895 | 13.9589 | 4.1843 | 5.5102 | 12.3263 | 11.1325 | 2.21741002359303 |
| **TCGA-06-2559-01** | 1 | 150 | 9.2788 | 12.0942 | 13.418 | 8.4955 | 9.1999 | 11.24 | 9.8759 | 2.28258706854344 |
| **TCGA-06-0878-01** | 0 | 218 | 12.6085 | 13.4019 | 13.3927 | 9.5837 | 9.7739 | 12.5765 | 8.45 | 2.3747311197898 |
| **TCGA-14-0787-01** | 1 | 68 | 10.4119 | 13.5469 | 13.5588 | 8.8168 | 8.409 | 12.0122 | 9.4068 | 2.69220738877938 |
| **TCGA-41-3915-01** | 1 | 360 | 9.344 | 12.8432 | 13.5919 | 10.8086 | 7.8346 | 11.5897 | 8.2851 | 2.77784031073269 |
| **TCGA-76-4928-01** | 1 | 94 | 8.9471 | 16.6197 | 14.7652 | 6.8827 | 6.9197 | 13.6489 | 10.0848 | 2.88963215333284 |
| **TCGA-32-2632-01** | 1 | 269 | 8.1211 | 13.3389 | 13.8033 | 9.217 | 6.5265 | 12.3251 | 10.521 | 3.04187451044029 |
| **TCGA-06-0210-02** | 1 | 225 | 10.9584 | 12.9997 | 13 | 10.229 | 9.6279 | 11.1107 | 8.9652 | 3.08833827891932 |
| **TCGA-41-4097-01** | 1 | 6 | 9.7696 | 15.0245 | 13.9091 | 7.2857 | 8.0911 | 11.9612 | 10.1133 | 3.15494593538345 |
| **TCGA-32-4213-01** | 0 | 604 | 10.3227 | 13.781 | 14.1921 | 8.6221 | 8.0966 | 12.284 | 9.7664 | 3.38330876885692 |
| **TCGA-28-5218-01** | 1 | 157 | 7.2883 | 14.4109 | 14.2099 | 7.4244 | 8.6528 | 10.7179 | 10.4346 | 3.55959561714288 |
| **TCGA-06-0750-01** | 1 | 28 | 9.9436 | 13.8258 | 14.1055 | 10.2801 | 8.0203 | 12.288 | 9.0944 | 3.63328467145083 |
| **TCGA-06-0747-01** | 1 | 82 | 11.7802 | 13.4739 | 13.0085 | 8.9047 | 8.3301 | 11.4219 | 9.9997 | 3.65903749630423 |
| **TCGA-06-5412-01** | 1 | 138 | 11.0651 | 15.7775 | 14.3455 | 6.0014 | 7.4366 | 12.1836 | 10.0859 | 3.69464142175336 |
| **TCGA-26-5135-01** | 1 | 270 | 9.4662 | 13.366 | 13.8317 | 8.9072 | 8.6337 | 10.207 | 8.8939 | 3.79982028085383 |
| **TCGA-14-0781-01** | 1 | 29 | 11.1477 | 15.2316 | 14.0404 | 7.4267 | 8.4636 | 12.2641 | 10.2691 | 3.8651985138418 |
| **TCGA-02-0055-01** | 1 | 76 | 11.5201 | 15.704 | 13.6313 | 6.1168 | 6.8001 | 12.8378 | 11.87 | 4.06828681837082 |
| **TCGA-27-1830-01** | 1 | 154 | 9.5676 | 12.445 | 12.5211 | 10.4458 | 8.6698 | 8.8995 | 8.8401 | 4.09850879699257 |
| **TCGA-06-0190-02** | 1 | 317 | 10.5984 | 15.1181 | 14.5864 | 5.6375 | 7.1192 | 13.0848 | 12.2906 | 4.28884177002832 |
| **TCGA-27-1832-01** | 1 | 300 | 11.3111 | 14.0504 | 13.2335 | 10.7317 | 9.8002 | 11.9382 | 10.5675 | 5.01510592092804 |
| **TCGA-19-1389-02** | 1 | 141 | 12.3649 | 15.2066 | 14.8033 | 11.1892 | 7.0253 | 12.235 | 9.7762 | 11.3357406139883 |

Supplementary Table S3 The risk score of each patient from CCGA-GBM cohort.

|  | **fustat** | **futime** | **PTX3** | **TIMP1** | **IGFBP2** | **SLC47A2** | **SNCAIP** | **LGALS3** | **LOXL1** | **riskScore** |
| --- | --- | --- | --- | --- | --- | --- | --- | --- | --- | --- |
| **CGGA_1001** | 0 | 3817 | 5.282069075 | 11.63049921 | 6.92943596 | 1.516015147 | 0.855989697 | 8.185420589 | 4.053111336 | 0.040447854 |
| **CGGA_1007** | 1 | 345 | 1.646162657 | 9.058127054 | 7.366584499 | 3.129283017 | 3.253989266 | 4.628773595 | 2.266036894 | 0.043527346 |
| **CGGA_1008** | 1 | 315 | 3.075532631 | 8.110405007 | 8.652737439 | 2.324810603 | 4.129283017 | 6.588114949 | 3.671293372 | 0.046747219 |
| **CGGA_1011** | 1 | 109 | 3.068670811 | 10.56140252 | 6.472812666 | 2.169925001 | 1.769771739 | 4.339137385 | 4.34553831 | 0.07684097 |
| **CGGA_1015** | 1 | 164 | 2.44625623 | 11.72958676 | 9.76851518 | 0.773996325 | 3.364572432 | 7.351115917 | 6.99830835 | 0.142553509 |
| **CGGA_1023** | 1 | 681 | 1.09085343 | 7.850874416 | 9.698027431 | 3.524815928 | 4.296457407 | 6.30103885 | 5.290203205 | 0.097474718 |
| **CGGA_1024** | 1 | 3074 | 2.59454855 | 9.031080852 | 8.156083076 | 1.10433666 | 2.650764559 | 8.589239157 | 4.976821852 | 0.028291042 |
| **CGGA_1026** | 1 | 1570 | 1.827819025 | 8.458160504 | 8.072802535 | 1.650764559 | 4.308156975 | 4.907371414 | 1.09085343 | 0.02637166 |
| **CGGA_1035** | 1 | 567 | 8.528297818 | 11.84111221 | 9.695802471 | 1.443606651 | 1.678071905 | 7.693277856 | 4.481557281 | 0.195373388 |
| **CGGA_1039** | 1 | 727 | 2.077242999 | 6.902556005 | 8.206526016 | 0.35614381 | 7.001014038 | 7.272489824 | 4.732811872 | 0.018557655 |
| **CGGA_1045** | 1 | 348 | 7.497213158 | 10.69761051 | 9.711563736 | 2.298658316 | 3 | 9.017560076 | 4.934988202 | 0.120757288 |
| **CGGA_1049** | 1 | 809 | 5.943218087 | 9.509913528 | 8.326159799 | 4.047887329 | 4.036503334 | 7.116447936 | 2.283921772 | 0.062124045 |
| **CGGA_1053** | 1 | 370 | 2.526068812 | 8.644469205 | 8.366103608 | 3.220329955 | 3.815575429 | 6.405141463 | 3.129283017 | 0.047087447 |
| **CGGA_1070** | 1 | 333 | 2.10433666 | 8.965293685 | 9.695210889 | 1.269033146 | 2.974529312 | 7.265661925 | 4.552131108 | 0.059540876 |
| **CGGA_1072** | 1 | 1090 | 1.40599236 | 7.837123296 | 9.036640695 | 0.111031312 | 4.145677455 | 5.682292371 | 2.350497247 | 0.026410855 |
| **CGGA_1073** | 1 | 270 | 2.392317423 | 9.877437522 | 10.24658623 | 1.480265122 | 4.185073638 | 6.810057442 | 3.196921734 | 0.067268111 |
| **CGGA_1074** | 1 | 86 | 3.486714373 | 9.069181209 | 8.239503062 | 3.989139007 | 4.231893162 | 6.965553435 | 4.15704371 | 0.065534633 |
| **CGGA_1077** | 1 | 591 | 5.866907978 | 10.9155209 | 9.951707261 | 2.678071905 | 3.068670811 | 8.596860621 | 4.873321063 | 0.129517163 |
| **CGGA_1083** | 1 | 450 | 3.599317794 | 10.6505402 | 8.532161085 | 1.704871964 | 2.201633861 | 6.984703267 | 4.5360529 | 0.074300554 |
| **CGGA_1091** | 1 | 1116 | 4.965784285 | 9.128252152 | 10.14400812 | 1.646162657 | 3.782408565 | 8.927007529 | 4.936873462 | 0.071222491 |
| **CGGA_1109** | 1 | 1348 | 4.323370069 | 6.344828497 | 8.532862387 | 3.161887682 | 5.019701914 | 4.534808661 | 2.241840184 | 0.058904144 |
| **CGGA_1114** | 1 | 460 | 2.163498732 | 8.954487147 | 9.060560842 | 3.142413438 | 4.693208149 | 7.514280096 | 3.321928095 | 0.042274094 |
| **CGGA_1124** | 1 | 484 | 6.754085782 | 9.889534384 | 8.262282806 | 3.122672719 | 3.357552005 | 7.293701542 | 3.781359714 | 0.084743802 |
| **CGGA_1139** | 1 | 1196 | 0.464668267 | 7.977050906 | 6.335569006 | 4.770829046 | 4.495695163 | 5.348019909 | 4.290571851 | 0.036945476 |
| **CGGA_1171** | 1 | 412 | 4.037382222 | 8.194362891 | 4.984133595 | 5.841218374 | 3.678071905 | 5.696272084 | 3.385431037 | 0.035465919 |
| **CGGA_1180** | 0 | 1226 | 5.243745235 | 8.905086099 | 10.07757682 | 4.074676686 | 4.487357715 | 8.275938239 | 4.120186028 | 0.103137718 |
| **CGGA_1214** | 1 | 604 | 2.606442228 | 8.24797497 | 9.539643506 | 4.06608919 | 4.396433531 | 7.672708196 | 4.060047384 | 0.065684047 |
| **CGGA_1216** | 1 | 312 | 1.292781749 | 8.141289724 | 7.04592344 | 5.18705509 | 4.286881148 | 6.990728004 | 3.073820233 | 0.027545158 |
| **CGGA_1219** | 1 | 2120 | 0.310340121 | 5.588264894 | 5.253611152 | 0.275007047 | 4.350497247 | 3.221877081 | 0.773996325 | 0.006571624 |
| **CGGA_1224** | 1 | 271 | 3.152183419 | 10.99763819 | 10.33765535 | 1.992768431 | 3.124328135 | 6.316688823 | 4.670727054 | 0.169489665 |
| **CGGA_1234** | 1 | 705 | 2.493134922 | 11.75211717 | 9.191824171 | 1.35614381 | 1.778208576 | 8.770961155 | 4.793375711 | 0.057520943 |
| **CGGA_1237** | 1 | 296 | 3.472487771 | 8.537490215 | 9.555758649 | 3 | 4.379898164 | 5.866413481 | 3.925049965 | 0.102971652 |
| **CGGA_1240** | 1 | 19 | 8.32210842 | 11.92668886 | 9.22602678 | 0.5360529 | 1.432959407 | 8.120704442 | 3.959770155 | 0.110598261 |
| **CGGA_1251** | 1 | 272 | 0.925999419 | 4.584962501 | 7.185172775 | 0.565597176 | 5.000901403 | 5.68846014 | 3.508428653 | 0.011487012 |
| **CGGA_1258** | 1 | 114 | 2.831877241 | 9.42399828 | 10.1333349 | 2.771885579 | 4.13422094 | 6.23227701 | 3.64038956 | 0.106797601 |
| **CGGA_1270** | 1 | 188 | 5.014355293 | 12.12690447 | 7.66860138 | 1.922197848 | 3.092545742 | 7.901711654 | 4.284662185 | 0.057581616 |
| **CGGA_1275** | 1 | 183 | 1.207892852 | 11.24599828 | 8.248117329 | 0 | 0.40053793 | 9.734794283 | 3.948600847 | 0.017522355 |
| **CGGA_1287** | 1 | 533 | 0.86393845 | 3.507160349 | 5.175923742 | 2.084064265 | 3.825785627 | 4.009884589 | 0.86393845 | 0.006082399 |
| **CGGA_1299** | 1 | 550 | 5.819157224 | 8.594697827 | 10.20878304 | 3.426264755 | 4.333423734 | 7.901228945 | 3.681449265 | 0.100631042 |
| **CGGA_1313** | 1 | 379 | 6.931683057 | 9.281582348 | 8.309157994 | 1.963474124 | 2.462052319 | 8.113429635 | 3.439623138 | 0.050977018 |
| **CGGA_1314** | 1 | 172 | 4.025028794 | 5.523875551 | 7.008764745 | 2.469885976 | 2.782408565 | 4.352617299 | 3.042644337 | 0.038884803 |
| **CGGA_1320** | 1 | 59 | 1.263034406 | 7.738835377 | 7.653203362 | 6.738632747 | 5.137093609 | 5.554895775 | 4.701549057 | 0.088650612 |
| **CGGA_1332** | 0 | 510 | 2.310340121 | 7.464014725 | 11.24077345 | 1.959770155 | 5.254745198 | 8.178316272 | 4.326968712 | 0.061079317 |
| **CGGA_1338** | 1 | 1122 | 5.659639187 | 9.780851402 | 8.741231012 | 4.372255648 | 2.992768431 | 6.888134388 | 4.705977902 | 0.152698453 |
| **CGGA_1342** | 1 | 186 | 6.87491989 | 11.26102535 | 8.486312138 | 4.735522177 | 4.336997417 | 6.632559052 | 2.994579724 | 0.14079665 |
| **CGGA_1384** | 1 | 191 | 1.163498732 | 5.805808349 | 5.341630009 | 0.641546029 | 4.606442228 | 3.498250868 | 1.560714954 | 0.009096402 |
| **CGGA_1409** | 0 | 2727 | 1.10433666 | 3.286881148 | 3.428946345 | 0.286881148 | 4.874305166 | 3.529820947 | 1.475084883 | 0.002999828 |
| **CGGA_274** | 0 | 610 | 4.080657663 | 10.21662462 | 9.405503155 | 1.700439718 | 3.810443104 | 5.80451827 | 4.501439145 | 0.126443751 |
| **CGGA_342** | 1 | 500 | 5.003152449 | 8.524580892 | 7.705148528 | 0.678071905 | 3.189033824 | 7.712320641 | 1.929790998 | 0.01740986 |
| **CGGA_413** | 0 | 183 | 1.389566812 | 8.463646977 | 9.426767933 | 3.184280294 | 3.03562391 | 6.111031312 | 1.304511042 | 0.042246103 |
| **CGGA_483** | 1 | 277 | 3.880685525 | 8.417725957 | 8.540360556 | 0.799087306 | 2.454175893 | 3.869871406 | 6.872089989 | 0.202227163 |
| **CGGA_491** | 1 | 1074 | 1.422233001 | 4.151371776 | 4.34269696 | 2.427606173 | 4.672425342 | 3.649615459 | 0.704871964 | 0.005761888 |
| **CGGA_494** | 0 | 4435 | 0.641546029 | 4.481557281 | 4.528571319 | 0.250961574 | 1.799087306 | 5.166313748 | 1 | 0.003264472 |
| **CGGA_499** | 1 | 122 | 2.543495883 | 8.918773811 | 9.181152257 | 1.372952098 | 3.469885976 | 7.976821852 | 2.15704371 | 0.024124121 |
| **CGGA_525** | 1 | 138 | 3.388189537 | 9.742494709 | 9.171452047 | 2.336283388 | 4.033863452 | 7.602513297 | 5.451870479 | 0.082814243 |
| **CGGA_604** | 1 | 381 | 7.606220121 | 10.90291018 | 8.887555733 | 1.063502942 | 2.722466024 | 8.305240966 | 4.225737653 | 0.080192038 |
| **CGGA_658** | 1 | 372 | 1.803227036 | 7.298658316 | 7.651769271 | 1.124328135 | 4.128458384 | 5.811214118 | 2.169925001 | 0.017850089 |
| **CGGA_676** | 1 | 376 | 4.244887059 | 8.343096863 | 7.787184297 | 2.35614381 | 2.916476644 | 8.440910683 | 3.672425342 | 0.02664739 |
| **CGGA_679** | 1 | 263 | 2.910732662 | 7.836934011 | 7.729960561 | 4.615887074 | 3.695993813 | 6.76540214 | 3.821710215 | 0.049106709 |
| **CGGA_680** | 1 | 2373 | 2.084064265 | 6.006522446 | 5.160274831 | 0.432959407 | 2.773996325 | 5.946496941 | 1.150559677 | 0.004824004 |
| **CGGA_700** | 0 | 170 | 1.257010618 | 2.541019153 | 3.837943242 | 1.550900665 | 4.105175192 | 3.736604875 | 1.735522177 | 0.004209462 |
| **CGGA_710** | 1 | 660 | 0.90303827 | 5.318678374 | 5.413120146 | 3.498250868 | 2.560714954 | 5.902314812 | 2.166715445 | 0.009317181 |
| **CGGA_731** | 1 | 503 | 4.234194723 | 9.480527685 | 8.607256327 | 2.09423607 | 4.307428525 | 7.064042126 | 3.9800253 | 0.057120251 |
| **CGGA_747** | 1 | 970 | 0.807354922 | 4.800641097 | 6.063934306 | 1.15704371 | 5.527946099 | 3.552131108 | 0.887525271 | 0.008480149 |
| **CGGA_759** | 1 | 1263 | 1.871843649 | 5.48058827 | 7.355439197 | 0.941106311 | 4.383358695 | 4.032982417 | 1.959770155 | 0.019238421 |
| **CGGA_761** | 1 | 1840 | 1.304511042 | 5.359310317 | 7.374517881 | 0.650764559 | 4.438292852 | 2.543495883 | 2 | 0.025868774 |
| **CGGA_782** | 1 | 289 | 3.008988783 | 8.012736263 | 6.857483428 | 5.80451827 | 3.327687364 | 5.842727469 | 3.397802962 | 0.056334551 |
| **CGGA_789** | 1 | 345 | 3.805292456 | 9.03968676 | 7.576219781 | 3.860962798 | 2.498250868 | 6.780178844 | 3.365972428 | 0.051686539 |
| **CGGA_802** | 1 | 681 | 7.507160349 | 9.498869147 | 8.264020286 | 1.50589093 | 2.9202933 | 7.429866991 | 3.650764559 | 0.063620104 |
| **CGGA_804** | 0 | 614 | 0.432959407 | 4.95930649 | 5.269781238 | 0.933572638 | 2.381283373 | 4.326249701 | 0.98550043 | 0.006031107 |
| **CGGA_808** | 0 | 1167 | 0.847996907 | 5.099715999 | 5.384395238 | 2.46727948 | 3.629939409 | 6.68846014 | 1.526068812 | 0.004750978 |
| **CGGA_837** | 1 | 432 | 4.836934011 | 7.848435159 | 9.732235276 | 1.438292852 | 3.943921327 | 8.10213319 | 2.427606173 | 0.034354935 |
| **CGGA_842** | 1 | 204 | 7.869748051 | 9.802370957 | 9.382105211 | 1.316145742 | 3.694880193 | 6.308703071 | 7.03265189 | 0.285790984 |
| **CGGA_848** | 0 | 239 | 2.671293372 | 9.589875819 | 9.422905743 | 1.627606838 | 3.769771739 | 6.887890772 | 4.680324357 | 0.073851685 |
| **CGGA_850** | 0 | 564 | 3.517275693 | 8.260260941 | 10.15266512 | 1.22650853 | 3.760220946 | 7.70120248 | 5.074676686 | 0.071822207 |
| **CGGA_859** | 1 | 387 | 7.158862106 | 12.47210186 | 10.11635696 | 3.63691458 | 3.17951105 | 8.322694323 | 3.615887074 | 0.189291176 |
| **CGGA_876** | 1 | 159 | 4.512226887 | 11.33163916 | 8.669097651 | 2.140778656 | 1.599317794 | 6.846117173 | 5.795195491 | 0.15067859 |
| **CGGA_878** | 1 | 863 | 2.23572706 | 9.04420284 | 10.10141108 | 2.40599236 | 3.634593268 | 7.891540703 | 3.475084883 | 0.053798574 |
| **CGGA_902** | 1 | 193 | 5.774259951 | 9.321973178 | 8.187203589 | 1.35614381 | 4.932155684 | 6.683134985 | 3.871843649 | 0.054084359 |
| **CGGA_D03** | 1 | 423 | 2.666756592 | 10.22756781 | 8.645982597 | 3.711494907 | 2.422233001 | 7.407182772 | 4.926473911 | 0.088965921 |
| **CGGA_D09** | 1 | 233 | 2.477677328 | 8.757089938 | 9.614746647 | 3.049630768 | 3.776103988 | 7.194165869 | 4.493134922 | 0.077954346 |
| **CGGA_D30** | 1 | 215 | 0.321928095 | 7.743353391 | 5.844486088 | 0.956056652 | 3.368768349 | 6.331812684 | 3.432959407 | 0.009911838 |
| **CGGA_D35** | 1 | 661 | 5.279099802 | 11.48885941 | 9.175973627 | 0.669026766 | 1.049630768 | 7.486875235 | 6.546585829 | 0.159589498 |
| **CGGA_D37** | 1 | 965 | 4.053111336 | 10.06982567 | 7.928133408 | 4.336283388 | 2.963474124 | 7.585037639 | 4.618238656 | 0.077897416 |
| **CGGA_D57** | 1 | 766 | 2.166715445 | 8.085180305 | 7.774589417 | 4.247168 | 4.172327492 | 6.178913785 | 4.937815169 | 0.065312314 |

Supplementary Table S4 Univariate cox regression analysis of risk score and clinical features.

| **id** | **HR** | **HR.95L** | **HR.95H** | **pvalue** |
| --- | --- | --- | --- | --- |
| **age** | 1.020169763 | 1.000861739 | 1.039850266 | 0.040528804 |
| **gender** | 1.35441199 | 0.825539609 | 2.222100331 | 0.229757804 |
| **IDH status** | 1.752243522 | 0.863257259 | 3.556711896 | 0.120454247 |
| **MGMT status** | 1.404521407 | 0.868373131 | 2.271696708 | 0.166152313 |
| **riskScore** | 3.02754417 | 1.241724658 | 4.813363682 | 0.000891266 |

Supplementary Table S5 Multivariate cox regression analysis of risk score and clinical features.

| **id** | **HR** | **HR.95L** | **HR.95H** | **pvalue** |
| --- | --- | --- | --- | --- |
| **age** | 1.010615129 | 0.99045611 | 1.031184449 | 0.304357576 |
| **riskScore** | 2.604372646 | 0.650363386 | 4.558381906 | 0.008993285 |
